# Supplementary material for: Motivation of Owners to Purchase Pedigree Cats, with Specific Focus on the Acquisition of Brachycephalic Cats
Source: PubMed Central journal article supplement (PMC6680495; doi:10.3390/ani9070394), 2019-06-27
Supplement: animals-09-00394-s001.pdf [file animals-09-00394-s001.pdf]

# What were your experiences when acquiring your cat?

---

## About this survey

### Privacy

Your privacy will be respected and all information you supply is confidential. By submitting this online questionnaire, you give permission for your data to be analysed and published (anonymously). Your personal information will be held and used in accordance with the Data Protection Act 1998 and will not be disclosed to any unauthorised person or body. Only the principal investigators in this study will have access to the data on the returned questionnaires. The data collected will be collated and stored at The University of Edinburgh (SRUC). However, if you change your mind part way through, you can leave the questionnaire at any point without submission of any data.

Only individuals aged over 18 years old are eligible to participate in this study. By proceeding, participants confirm that they are over 18 years old.

**1.** I have read and understood the above explanation and am willing to allow my data to be used for this research project and any resulting publications. I hereby consent to participate in this study.  *Required*

Yes

Thank you in advance for your participation.

# About you

**2. Country: What is your country of residence?**

**3. Age: What is your age?**

- 18-24
- 25-34
- 35-44
- 45-54
- 55-64
- 65 or older

**4. Gender: What is your gender?**

- Male
- Female
- Other
- Rather not answer

**5. Level of education: What is the highest of level education you have completed?**

- Some high school
- High school graduate (or equivalent)
- Some college/university

- Undergraduate degree (or equivalent)
- Trade/technical/vocational training
- Some postgraduate work
- Postgraduate degree (Master's)
- Ph.D. or medical degree
- Veterinary medicine degree

**6. Household income: What was your total household income before taxes during the past 12 months?**

- Less than £10,000
- £10,000-£14,999
- £15,000-£24,999
- £25,000-£34,999
- £35,000-£49,999
- £50,000-£74,999
- £75,000-£99,999
- £100,000-£149,999
- £150,000 or more
- Not sure
- Rather not answer

**7. Marital status: What is your marital status?**

- Single
- In a relationship
- Married
- Separated
- Divorced

**Widowed**

**Other**

# Your home

**8.** Living area: What type of area do you live in?

- Urban
- Rural
- Suburban

**9.** Residence: What kind of house do you live in?

- Detached
- Semi-detached
- Terrace
- Flat / apartment
- Other

**9.a.** If you selected Other, please specify:

**10.** How many rooms (in total) in your house?

**11.** How many people currently reside in your home?

Men of 18 years, or more:

Please select

|                             |                 |
|-----------------------------|-----------------|
| Women of 18 years, or more: | Please select ▼ |
| Children under 18:          | Please select ▼ |

**12.** Do you have other pets in your household other than your cat/cats? *Tick all that apply*

- Dog(s)
- Rabbit(s)
- Hamster(s)/guineapig(s)
- Bird(s)
- Reptile(s)
- No
- Other

**12.a.** If you selected Other, please specify:

## About your cat(s)

In this section, some of the questions refer to just one cat. If you have multiple cats in your household, please answer these questions for your most recently acquired pedigree cat.

If you do not have any pedigree cats, please answer this question for your most recently acquired cat.

**13.** Are you a first-time cat owner?

- Yes
- No

**14.** How many cats do you currently own?

**15.** What type of cat(s) do you own? *Tick all that apply.*

- Non-pedigree cat
- Pure-breed
- Wild cat hybrid e.g. Bengal, Savanna, etc.
- I don't know / I'm not sure

**16.** If your most recently acquired cat is a pure-breed or wild cat hybrid, what is their breed?

- |                                            |                                             |                                            |
|--------------------------------------------|---------------------------------------------|--------------------------------------------|
| <input type="checkbox"/> Abyssinian        | <input type="checkbox"/> Asian              | <input type="checkbox"/> American Bobtail  |
| <input type="checkbox"/> American Curl     | <input type="checkbox"/> American Shorthair | <input type="checkbox"/> American Wirehair |
| <input type="checkbox"/> Australian Mist   | <input type="checkbox"/> Balinese           | <input type="checkbox"/> Bengal            |
| <input type="checkbox"/> Birman            | <input type="checkbox"/> Bombay             | <input type="checkbox"/> British Longhair  |
| <input type="checkbox"/> British Shorthair | <input type="checkbox"/> Burmese            | <input type="checkbox"/> Burmilla          |
| <input type="checkbox"/> Chartreux         | <input type="checkbox"/> Chausie            | <input type="checkbox"/> Cornish Rex       |
| <input type="checkbox"/> Cymric            | <input type="checkbox"/> Devon Rex          | <input type="checkbox"/> Donskoy           |
| <input type="checkbox"/> Egyptian Mau      | <input type="checkbox"/> Exotic Shorthair   | <input type="checkbox"/> Havana Brown      |
| <input type="checkbox"/> Himalayan         | <input type="checkbox"/> Japanese Bobtail   | <input type="checkbox"/> Khaomanee         |
| <input type="checkbox"/> Korat             | <input type="checkbox"/> Kurilian Bobtail   | <input type="checkbox"/> LaPerm            |
| <input type="checkbox"/> Maine Coon        | <input type="checkbox"/> Manx               | <input type="checkbox"/> Minuet            |
| <input type="checkbox"/> Munchkin          | <input type="checkbox"/> Nebelung           | <input type="checkbox"/> Norwegian Forest  |
| <input type="checkbox"/> Ocicat            | <input type="checkbox"/> Oriental Shorthair | <input type="checkbox"/> Persian           |
| <input type="checkbox"/> Peterbald         | <input type="checkbox"/> Pixiebob           | <input type="checkbox"/> Ragdoll           |
| <input type="checkbox"/> Ragamuffin        | <input type="checkbox"/> Russian Blue       | <input type="checkbox"/> Savannah          |
| <input type="checkbox"/> Scottish Fold     | <input type="checkbox"/> Selkirk Rex        | <input type="checkbox"/> Siamese           |
| <input type="checkbox"/> Siberian          | <input type="checkbox"/> Singapura          | <input type="checkbox"/> Snowshoe          |
| <input type="checkbox"/> Somali            | <input type="checkbox"/> Sphynx             | <input type="checkbox"/> Thai Lilac        |
| <input type="checkbox"/> Tonkinese         | <input type="checkbox"/> Toyger             | <input type="checkbox"/> Turkish Angora    |
| <input type="checkbox"/> Turkish Van       | <input type="checkbox"/> Other              |                                            |

**16.a.** If you selected Other, please specify:



## Your previous experience with cat(s)

**17.** How many cats have you owned previously in your whole lifetime (Including those you own now)?

**18.** If you have ever owned a different type of cat to those you currently own, what best describes their breed(s)?

- Non-pedigree cat
- Pure-breed
- Wild cat hybrid e.g. Bengal, Savanna, etc.
- I have never owned any other type of cat

**18.a.** Please choose all previously owned pure-breeds and/or hybrids types of cat you have owned:

- |                                            |                                             |                                            |
|--------------------------------------------|---------------------------------------------|--------------------------------------------|
| <input type="checkbox"/> Abyssinian        | <input type="checkbox"/> Asian              | <input type="checkbox"/> American Bobtail  |
| <input type="checkbox"/> American Curl     | <input type="checkbox"/> American Shorthair | <input type="checkbox"/> American Wirehair |
| <input type="checkbox"/> Australian Mist   | <input type="checkbox"/> Balinese           | <input type="checkbox"/> Bengal            |
| <input type="checkbox"/> Birman            | <input type="checkbox"/> Bombay             | <input type="checkbox"/> British Longhair  |
| <input type="checkbox"/> British Shorthair | <input type="checkbox"/> Burmese            | <input type="checkbox"/> Burmilla          |
| <input type="checkbox"/> Chartreux         | <input type="checkbox"/> Chausie            | <input type="checkbox"/> Cornish Rex       |
| <input type="checkbox"/> Cymric            | <input type="checkbox"/> Devon Rex          | <input type="checkbox"/> Donskoy           |
| <input type="checkbox"/> Egyptian Mau      | <input type="checkbox"/> Exotic Shorthair   | <input type="checkbox"/> Havana Brown      |
| <input type="checkbox"/> Himalayan         | <input type="checkbox"/> Japanese Bobtail   | <input type="checkbox"/> Khaomanee         |
| <input type="checkbox"/> Korat             | <input type="checkbox"/> Kurilian Bobtail   | <input type="checkbox"/> LaPerm            |
| <input type="checkbox"/> Maine Coon        | <input type="checkbox"/> Manx               | <input type="checkbox"/> Minuet            |
| <input type="checkbox"/> Munchkin          | <input type="checkbox"/> Nebelung           | <input type="checkbox"/> Norwegian Forest  |
| <input type="checkbox"/> Ocicat            | <input type="checkbox"/> Oriental Shorthair | <input type="checkbox"/> Persian           |

- |                                        |                                       |                                         |
|----------------------------------------|---------------------------------------|-----------------------------------------|
| <input type="checkbox"/> Peterbald     | <input type="checkbox"/> Pixiebob     | <input type="checkbox"/> Ragdoll        |
| <input type="checkbox"/> Ragamuffin    | <input type="checkbox"/> Russian Blue | <input type="checkbox"/> Savannah       |
| <input type="checkbox"/> Scottish Fold | <input type="checkbox"/> Selkirk Rex  | <input type="checkbox"/> Siamese        |
| <input type="checkbox"/> Siberian      | <input type="checkbox"/> Singapura    | <input type="checkbox"/> Snowshoe       |
| <input type="checkbox"/> Somali        | <input type="checkbox"/> Sphynx       | <input type="checkbox"/> Thai Lilac     |
| <input type="checkbox"/> Tonkinese     | <input type="checkbox"/> Toyger       | <input type="checkbox"/> Turkish Angora |
| <input type="checkbox"/> Turkish Van   | <input type="checkbox"/> Other        |                                         |

**18.a.i.** If you selected Other, please specify:

**19.** If you have owned a different type of cat before, why did you acquire a cat of a different breed/type this time?

- This cat needed a new home
- Unhappy with the already owned breed
- Wanted another breed
- The same breed was not available
- Sudden availability of different breed
- I have never owned any other breed of cat
- Other

**19.a.** If you selected Other, please specify:

**19.b.** Please explain why:

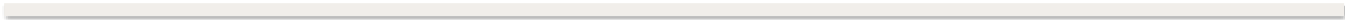

## About your cat

If you have multiple cats in your household, please answer ALL further questions for your most recently acquired pedigree cat.

If you do not have any pedigree cats, please answer this question for your most recently acquired cat.

**20.** What is the name of your cat? *Optional*

**21.** How old was your cat when you acquired him/her (in years)?

**22.** How old is your cat now?

**23.** What is the sex of your cat?

- Female
- Male
- Other

**24. Has your cat been neutered?**

- Yes
- No
- I don't know/not sure

**25. Do you intend to breed from your cat?**

- Yes
- No
- Not sure yet/undecided

**26. Do you allow your cat outdoor access?**

- Yes, my cat has free access to the outdoors
- Yes, my cat has limited access to the outdoors (e.g. confined garden)
- No

**27. Please rate each of these aspects of your cat, on a scale of 1-5 (1 is very poor, 5 is very good):**

|                     | 1. Very poor             | 2.                       | 3.                       | 4.                       | 5. Very good             |
|---------------------|--------------------------|--------------------------|--------------------------|--------------------------|--------------------------|
| Appearance          | <input type="checkbox"/> | <input type="checkbox"/> | <input type="checkbox"/> | <input type="checkbox"/> | <input type="checkbox"/> |
| Behaviour           | <input type="checkbox"/> | <input type="checkbox"/> | <input type="checkbox"/> | <input type="checkbox"/> | <input type="checkbox"/> |
| Companionship       | <input type="checkbox"/> | <input type="checkbox"/> | <input type="checkbox"/> | <input type="checkbox"/> | <input type="checkbox"/> |
| Ease of maintenance | <input type="checkbox"/> | <input type="checkbox"/> | <input type="checkbox"/> | <input type="checkbox"/> | <input type="checkbox"/> |

|                                         |                          |                          |                          |                          |                          |
|-----------------------------------------|--------------------------|--------------------------|--------------------------|--------------------------|--------------------------|
| Health                                  | <input type="checkbox"/> | <input type="checkbox"/> | <input type="checkbox"/> | <input type="checkbox"/> | <input type="checkbox"/> |
| Energy/Exercise levels                  | <input type="checkbox"/> | <input type="checkbox"/> | <input type="checkbox"/> | <input type="checkbox"/> | <input type="checkbox"/> |
| Costs (1 is low costs, 5 is high costs) | <input type="checkbox"/> | <input type="checkbox"/> | <input type="checkbox"/> | <input type="checkbox"/> | <input type="checkbox"/> |

**28.** In general, how happy are you with your cat?

- Very happy
- Happy
- Neither happy nor unhappy
- Unhappy
- Very unhappy

**29.** Would you recommend this breed/type of cat to your friends and family?

- Yes
- No
- Not sure

**29.a.** Please explain why:

**29.b.** Please explain why:

**29.c.** Please explain why:

**30.** Do you have any further comments with regards to your satisfaction/dissatisfaction with your cat's breed/type?

## Your research before getting your cat

**31.** Did you carry out any research prior to acquiring your cat?

- Yes, on the breed/type of my cat
- Yes, on cat ownership in general
- Yes, on both breed/type and cat ownership
- No



# Your research before getting your cat

**32.** What sources did you use to research about your cat's breed/type and how much did you use these resources?

|                                             | Not at all               | 1. Used very little      | 2.                       | 3.                       | 4.                       | 5. Used very much        |
|---------------------------------------------|--------------------------|--------------------------|--------------------------|--------------------------|--------------------------|--------------------------|
| Online research/websites                    | <input type="checkbox"/> | <input type="checkbox"/> | <input type="checkbox"/> | <input type="checkbox"/> | <input type="checkbox"/> | <input type="checkbox"/> |
| Talking to friends/family                   | <input type="checkbox"/> | <input type="checkbox"/> | <input type="checkbox"/> | <input type="checkbox"/> | <input type="checkbox"/> | <input type="checkbox"/> |
| Talking to a breeder                        | <input type="checkbox"/> | <input type="checkbox"/> | <input type="checkbox"/> | <input type="checkbox"/> | <input type="checkbox"/> | <input type="checkbox"/> |
| Talking to other cat owners                 | <input type="checkbox"/> | <input type="checkbox"/> | <input type="checkbox"/> | <input type="checkbox"/> | <input type="checkbox"/> | <input type="checkbox"/> |
| Talking to a vet/vet nurse/vet receptionist | <input type="checkbox"/> | <input type="checkbox"/> | <input type="checkbox"/> | <input type="checkbox"/> | <input type="checkbox"/> | <input type="checkbox"/> |
| Books                                       | <input type="checkbox"/> | <input type="checkbox"/> | <input type="checkbox"/> | <input type="checkbox"/> | <input type="checkbox"/> | <input type="checkbox"/> |
| Cat magazines                               | <input type="checkbox"/> | <input type="checkbox"/> | <input type="checkbox"/> | <input type="checkbox"/> | <input type="checkbox"/> | <input type="checkbox"/> |
| Other                                       | <input type="checkbox"/> | <input type="checkbox"/> | <input type="checkbox"/> | <input type="checkbox"/> | <input type="checkbox"/> | <input type="checkbox"/> |

**32.a.** If you used *online sources/websites*, please specify:

**32.b.** If you used *other* resources, please specify:

**33. Prior to your research, how much did you feel you already knew about these topics in relation to your breed/type of cat?**

|                     | 1. I didn't know anything about this topic | 2. I knew very little about this topic | 3. I knew a moderate amount about this topic | 4. I knew a sufficient amount about this topic | 5. I knew a lot about this topic |
|---------------------|--------------------------------------------|----------------------------------------|----------------------------------------------|------------------------------------------------|----------------------------------|
| Health              | <input type="checkbox"/>                   | <input type="checkbox"/>               | <input type="checkbox"/>                     | <input type="checkbox"/>                       | <input type="checkbox"/>         |
| Behaviour           | <input type="checkbox"/>                   | <input type="checkbox"/>               | <input type="checkbox"/>                     | <input type="checkbox"/>                       | <input type="checkbox"/>         |
| Lifespan            | <input type="checkbox"/>                   | <input type="checkbox"/>               | <input type="checkbox"/>                     | <input type="checkbox"/>                       | <input type="checkbox"/>         |
| Ease of maintenance | <input type="checkbox"/>                   | <input type="checkbox"/>               | <input type="checkbox"/>                     | <input type="checkbox"/>                       | <input type="checkbox"/>         |
| Genetic problems    | <input type="checkbox"/>                   | <input type="checkbox"/>               | <input type="checkbox"/>                     | <input type="checkbox"/>                       | <input type="checkbox"/>         |

**34. Following your research, how much do you feel you know about these topics in relation to your breed/type of cat?**

|                     | 1. I don't know anything about this topic | 2. I know very little about this topic | 3. I know a moderate amount about this topic | 4. I know a sufficient amount about this topic | 5. I know a lot about this topic |
|---------------------|-------------------------------------------|----------------------------------------|----------------------------------------------|------------------------------------------------|----------------------------------|
| Health              | <input type="checkbox"/>                  | <input type="checkbox"/>               | <input type="checkbox"/>                     | <input type="checkbox"/>                       | <input type="checkbox"/>         |
| Behaviour           | <input type="checkbox"/>                  | <input type="checkbox"/>               | <input type="checkbox"/>                     | <input type="checkbox"/>                       | <input type="checkbox"/>         |
| Lifespan            | <input type="checkbox"/>                  | <input type="checkbox"/>               | <input type="checkbox"/>                     | <input type="checkbox"/>                       | <input type="checkbox"/>         |
| Ease of maintenance | <input type="checkbox"/>                  | <input type="checkbox"/>               | <input type="checkbox"/>                     | <input type="checkbox"/>                       | <input type="checkbox"/>         |
| Genetic problems    | <input type="checkbox"/>                  | <input type="checkbox"/>               | <input type="checkbox"/>                     | <input type="checkbox"/>                       | <input type="checkbox"/>         |

**35. Had you heard of any breed-related problems that affect the following parts of your cat's body before you acquired your cat? *Tick all that apply.***

- Heart and blood vessels (e.g. heart disease )**
- Glands e.g. the pituitary gland, thyroid glands (e.g. hyperthyroidism), pancreas (e.g. diabetes).**
- Digestive system (including stomach, intestines, liver)**
- Skin and/or hair**
- Muscles and/or skeleton (e.g. joint problems, arthritis)**
- Reproductive organs**
- The urinary system (including the kidneys and bladder)**
- Breathing (including nose, throat and lungs).**
- Eyes (e.g. secretion, inflammation)**
- Mouth and/or jaw**
- I hadn't heard of any breed-related health problems**
- I have a non-pedigree cat (not applicable)**

# Acquiring your cat

**36.** From where did you acquire your cat?

- Breeder
- Self bred
- Friend/neighbour
- Pet Shop
- Charity Rescue Shelter (e.g. RSPCA, Blue Cross, etc.)
- Website
- Other

**36.a.** Please specify:

**36.b.** Please specify:

**36.c.** If you selected Other, please specify:

**37.** What was your motivation in acquiring this cat? *Tick all that apply.*

- Companionship
- As a companion for another animal
- Found/rescued
- Pre-cursor to children

- A family member/partner acquired it
- For the children
- For breeding
- Special needs (e.g. therapy animal)
- Space limitations but really wanted a pet
- Other

**37.a.** If you selected Other, please specify:

**38.** If you paid to purchase your cat, how much did your cat cost (in £ GBP)? *Optional*

**39.** How much did the following factors influence your choice of cat?

|                                                               | 1. Not an influence      | 2. Little influence      | 3. Moderate influence    | 4. Strong influence      | 5. Very strong influence |
|---------------------------------------------------------------|--------------------------|--------------------------|--------------------------|--------------------------|--------------------------|
| Appearance                                                    | <input type="checkbox"/> | <input type="checkbox"/> | <input type="checkbox"/> | <input type="checkbox"/> | <input type="checkbox"/> |
| Childhood experiences (e.g. you grew up with this breed/type) | <input type="checkbox"/> | <input type="checkbox"/> | <input type="checkbox"/> | <input type="checkbox"/> | <input type="checkbox"/> |
| Popularity of the breed/type                                  | <input type="checkbox"/> | <input type="checkbox"/> | <input type="checkbox"/> | <input type="checkbox"/> | <input type="checkbox"/> |
| Celebrity endorsement /ownership                              | <input type="checkbox"/> | <input type="checkbox"/> | <input type="checkbox"/> | <input type="checkbox"/> | <input type="checkbox"/> |

|                                                                |                          |                          |                          |                          |                          |
|----------------------------------------------------------------|--------------------------|--------------------------|--------------------------|--------------------------|--------------------------|
| Good cat breed/type for children                               | <input type="checkbox"/> | <input type="checkbox"/> | <input type="checkbox"/> | <input type="checkbox"/> | <input type="checkbox"/> |
| Good companion breed/type                                      | <input type="checkbox"/> | <input type="checkbox"/> | <input type="checkbox"/> | <input type="checkbox"/> | <input type="checkbox"/> |
| Cost (of the cat, plus potential vet bills, etc)               | <input type="checkbox"/> | <input type="checkbox"/> | <input type="checkbox"/> | <input type="checkbox"/> | <input type="checkbox"/> |
| This breed/type is generally healthy                           | <input type="checkbox"/> | <input type="checkbox"/> | <input type="checkbox"/> | <input type="checkbox"/> | <input type="checkbox"/> |
| This breed/type is easy to take care of                        | <input type="checkbox"/> | <input type="checkbox"/> | <input type="checkbox"/> | <input type="checkbox"/> | <input type="checkbox"/> |
| Recommended by a friend/family member                          | <input type="checkbox"/> | <input type="checkbox"/> | <input type="checkbox"/> | <input type="checkbox"/> | <input type="checkbox"/> |
| Recommended by a veterinary professional (e.g. vet, vet nurse) | <input type="checkbox"/> | <input type="checkbox"/> | <input type="checkbox"/> | <input type="checkbox"/> | <input type="checkbox"/> |

**40.** If you were to go back in time to before you acquired your cat, would you do anything differently?

- Yes
- No

**40.a.** What would you change? *Please tick all that apply.*

- Levels of pre-purchase research
- Where I acquired my cat
- The breed/type I acquired
- I would not have acquired him/her

Other

**40.a.i.** If you selected Other, please specify:

# Acquiring your cat from a breeder

**41.** How did you find out about this breeder?

- Personal website
- Gumtree/otherwebsite
- Social media
- Newspaper advert
- Breed club register
- Recommendation from friends/family
- Recommendation from another breeder
- Other

**41.a.** If you selected *Other website*, please specify:

**41.b.** If you selected *Other*, please specify:

**42.** Where did you meet the breeder to see your cat?

- At their home
- At your own home
- Other

**42.a.** If you selected *Other*, please specify:



**43.** Did you see the mother & father of your cat?

- Mother only
- Father only
- Both
- Neither

**44.** Did you see the brothers and/or sisters of your cat (from the same litter)?

- Yes, all
- Yes, some
- No

**45.** How was your cat born?

- Naturally
- By elective (planned) caesarean section
- By emergency caesarean section
- I don't know

**46.** How long has the breeder been breeding?

- Less than 5 years

- 5-10 years
- 10-20 years
- Over 20years
- I don'tknow

**47.** Are the breeders of your cat involved in cat shows?

- Yes
- No
- I don't know

**47.a.** If you selected Other, please specify:

**48.** How many litters do the breeders of your cat breed per year on average?

- They don't breed their cat(s) every year
- At least one litter per year
- I don't know

**49.** Did you visit any other breeders before the one you purchased your cat from?

- Yes
- No

**50.** Did you visit the breeder on more than one occasion prior to purchasing your cat?

- Yes
- No

**51.** Was there a waiting list for your cat?

- Yes
- No
- I don't know

**52.** Did the breeder have a “lifetime returns policy” on their cats?

- Yes
- No
- I don't know

**53.** Did you ASK to see health records of the mother and father of your cat?

- Yes
- No

**54.** Were health records AVAILABLE for the mother and father of your cat?

- Yes – only for the mother
- Yes – only for the father

- Yes – for both parents
- No
- I don't know

**55.** Had the parents of your cat undergone any genetic testing before breeding?

- Mother only
- Father only
- Both
- Neither
- There are no genetic tests available for this breed
- I don't know

**56.** Had the parents of your cat undergone any infectious disease testing before breeding? e.g. FeLV / FIV?

- Mother only
- Father only
- Both
- Neither
- I don't know

**57.** Had the parents of your cat undergone any tests (e.g. hip X-rays, heart scans) prior to breeding? e.g. to check for hip dysplasia or heart disease.

- Mother only
- Father only

- Both**
- Neither**
- I don't know**

## Your cat's health and welfare

**58.** In general, how healthy do you consider your cat to be over the course of his/her life, on a scale of 1-7 (*1 is very poor health, 7 is very healthy*)?

|      | 1. Very poor health      | 2                        | 3                        | 4                        | 5                        | 6                        | 7. Very healthy          |
|------|--------------------------|--------------------------|--------------------------|--------------------------|--------------------------|--------------------------|--------------------------|
| Rank | <input type="checkbox"/> | <input type="checkbox"/> | <input type="checkbox"/> | <input type="checkbox"/> | <input type="checkbox"/> | <input type="checkbox"/> | <input type="checkbox"/> |

**58.a.** If you rated the health of your cat as less than 7 (very healthy) please explain why you chose this:

**59.** How often has your cat visited a veterinary surgeon/received veterinary care per year, on average, since you acquired him/her?

- Less than once a year
- Once or twice a year
- Three to five times a year
- More than five visits a year
- I have never taken my cat to the vet

**60.** Why has your cat been taken to the vet? *Tick all that apply.*

- Vaccinations
- Routine health checks
- For one short-term health problem

- For more than one short-term health problem
- For a long-term health problem
- For more than one long-term health problem
- For a physical injury
- For a behaviour problem

**61.** Please estimate what you have paid in veterinary costs for your cat to date (in £ GBP). Please include costs covered by insurance:

**62.** Do you have insurance for your cat?

- No, I do not have insurance
- Yes, but for accidents only
- Yes, but I'm not sure of the details
- Yes, but it is time-limited (e.g. for a year at a time, or up to a certain age)
- Yes, to a maximum cost benefit per condition

**62.a.** In the amount of:

- Up to £1000 per condition
- Between £1000 and £4000 per condition
- Between £4000 and £7000 per condition
- For over £7000 per condition
- Yes, but for a different amount than listed above

**63.** Has your cat ever been diagnosed with any problems that affect any of the following parts of his/her body? *Tick all that apply.*

- Heart and blood vessels (e.g. heart disease or high blood pressure)
- Glands e.g. the pituitary gland, thyroid glands (e.g. hyperthyroidism), pancreas (e.g. diabetes).
- Digestive system (including stomach, intestines, liver)
- Skin and/or hair
- Muscles and/or skeleton (e.g. joint problems, arthritis)
- Reproductive organs
- The urinary system (including the kidneys and bladder)
- Breathing (including nose, throat and lungs).
- Eyes (e.g. secretion, inflammation)
- Mouth and/or jaw
- My cat has never been diagnosed with any of these problems

**64.** To what extent do your cat's health problems negatively affect their quality of life?

|                         | My cat has no significant health problems with that part of the body | 1. Have no effect on their quality of life | 2                        | 3.                       | 4.                       | 5. Have a significant negative effect on their quality of life |
|-------------------------|----------------------------------------------------------------------|--------------------------------------------|--------------------------|--------------------------|--------------------------|----------------------------------------------------------------|
| Heart and blood vessels | <input type="checkbox"/>                                             | <input type="checkbox"/>                   | <input type="checkbox"/> | <input type="checkbox"/> | <input type="checkbox"/> | <input type="checkbox"/>                                       |
| Glands                  | <input type="checkbox"/>                                             | <input type="checkbox"/>                   | <input type="checkbox"/> | <input type="checkbox"/> | <input type="checkbox"/> | <input type="checkbox"/>                                       |
| Digestive system        | <input type="checkbox"/>                                             | <input type="checkbox"/>                   | <input type="checkbox"/> | <input type="checkbox"/> | <input type="checkbox"/> | <input type="checkbox"/>                                       |
| Skin and/or hair        | <input type="checkbox"/>                                             | <input type="checkbox"/>                   | <input type="checkbox"/> | <input type="checkbox"/> | <input type="checkbox"/> | <input type="checkbox"/>                                       |



|                         |                          |                          |                          |                          |                          |                          |
|-------------------------|--------------------------|--------------------------|--------------------------|--------------------------|--------------------------|--------------------------|
| Muscles and/or skeleton | <input type="checkbox"/> | <input type="checkbox"/> | <input type="checkbox"/> | <input type="checkbox"/> | <input type="checkbox"/> | <input type="checkbox"/> |
| Reproductive organs     | <input type="checkbox"/> | <input type="checkbox"/> | <input type="checkbox"/> | <input type="checkbox"/> | <input type="checkbox"/> | <input type="checkbox"/> |
| The urinary system      | <input type="checkbox"/> | <input type="checkbox"/> | <input type="checkbox"/> | <input type="checkbox"/> | <input type="checkbox"/> | <input type="checkbox"/> |
| Breathing               | <input type="checkbox"/> | <input type="checkbox"/> | <input type="checkbox"/> | <input type="checkbox"/> | <input type="checkbox"/> | <input type="checkbox"/> |
| Eyes                    | <input type="checkbox"/> | <input type="checkbox"/> | <input type="checkbox"/> | <input type="checkbox"/> | <input type="checkbox"/> | <input type="checkbox"/> |
| Mouth and/or jaw        | <input type="checkbox"/> | <input type="checkbox"/> | <input type="checkbox"/> | <input type="checkbox"/> | <input type="checkbox"/> | <input type="checkbox"/> |

**65.** Do you have any other comments on your cat's quality of life?

**Thank you for completing and submitting this questionnaire.**

---

## **Key for selection options**

**2 - Country: What is your country of residence?**

**Afghanistan**

**Albania**

**Algeria**

**American Samoa**

**Andorra**

**Angola**

**Anguilla**

**Antigua and Barbuda**

**Argentina**

**Armenia**

**Aruba**

**Australia**

**Austria**

**Azerbaijan**

**The Bahamas**

**Bahrain**

**Bangladesh**

**Barbados**

**Belarus**

**Belgium**

**Belize**

**Benin**

**Bermuda**

**Bhutan**

**Bolivia**

**Bosnia and Herzegovina**

**Botswana**

**Brazil**

**Brunei**

**Bulgaria**

**Burkina Faso**

**Burundi**

**Cambodia**

**Cameroon**  
**Canada**  
**Cape Verde**  
**Cayman Islands**  
**Central African Republic**  
**Chad**  
**Chile**  
**People's Republic of China**  
**Republic of China**  
**Christmas Island**  
**Cocos (Keeling) Islands**  
**Colombia**  
**Comoros**  
**Congo**  
**Cook Islands**  
**Costa Rica**  
**Cote d'Ivoire**  
**Croatia**  
**Cuba**  
**Cyprus**  
**Czech Republic**  
**Denmark**  
**Djibouti**  
**Dominica**  
**Dominican Republic**  
**Ecuador**  
**Egypt**  
**El Salvador**  
**Equatorial Guinea**  
**Eritrea**  
**Estonia**  
**Ethiopia**  
**Falkland Islands**  
**Faroe Islands**  
**Fiji**  
**Finland**  
**France**  
**French Polynesia**  
**Gabon**  
**The Gambia**

**Georgia**  
**Germany**  
**Ghana**  
**Gibraltar**  
**Greece**  
**Greenland**  
**Grenada**  
**Guadeloupe**  
**Guam**  
**Guatemala**  
**Guernsey**  
**Guinea**  
**Guinea - Bissau**  
**Guyana**  
**Haiti**  
**Honduras**  
**Hong Kong**  
**Hungary**  
**Iceland**  
**India**  
**Indonesia**  
**Iran**  
**Iraq**  
**Ireland**  
**Israel**  
**Italy**  
**Jamaica**  
**Japan**  
**Jersey**  
**Jordan**  
**Kazakhstan**  
**Kenya**  
**Kiribati**  
**North Korea**  
**South Korea**  
**Kosovo**  
**Kuwait**  
**Kyrgyzstan**  
**Laos**  
**Latvia**

**Lebanon**  
**Lesotho**  
**Liberia**  
**Libya**  
**Liechtenstein**  
**Lithuania**  
**Luxembourg**  
**Macau**  
**Macedonia**  
**Madagascar**  
**Malawi**  
**Malaysia**  
**Maldives**  
**Mali**  
**Malta**  
**Marshall Islands**  
**Martinique**  
**Mauritania**  
**Mauritius**  
**Mayotte**  
**Mexico**  
**Micronesia**  
**Moldova**  
**Monaco**  
**Mongolia**  
**Montenegro**  
**Montserrat**  
**Morocco**  
**Mozambique**  
**Myanmar**  
**Nagorno-Karabakh**  
**Namibia**  
**Nauru**  
**Nepal**  
**Netherlands**  
**Netherlands Antilles**  
**New Caledonia**  
**New Zealand**  
**Nicaragua**  
**Niger**

**Nigeria**  
**Niue**  
**Norfolk Island**  
**Turkish Republic of Northern Cyprus**  
**Northern Mariana**  
**Norway**  
**Oman**  
**Pakistan**  
**Palau**  
**Palestinian territories, Occupied**  
**Panama**  
**Papua New Guinea**  
**Paraguay**  
**Peru**  
**Philippines**  
**Pitcairn Islands**  
**Poland**  
**Portugal**  
**Puerto Rico**  
**Qatar**  
**Romania**  
**Russia**  
**Rwanda**  
**Saint Barthelemy**  
**Saint Helena**  
**Saint Kitts and Nevis**  
**Saint Lucia**  
**Saint Martin**  
**Saint Pierre and Miquelon**  
**Saint Vincent and the Grenadines**  
**Samoa**  
**San Marino**  
**Sao Tome and Principe**  
**Saudi Arabia**  
**Senegal**  
**Serbia**  
**Seychelles**  
**Sierra Leone**  
**Singapore**  
**Slovakia**

**Slovenia**  
**Solomon Islands**  
**Somalia**  
**Somaliland**  
**South Africa**  
**South Ossetia**  
**Spain**  
**Sri Lanka**  
**Sudan**  
**Suriname**  
**Svalbard**  
**Swaziland**  
**Sweden**  
**Switzerland**  
**Syria**  
**Taiwan**  
**Tajikistan**  
**Tanzania**  
**Thailand**  
**Timor - Leste**  
**Togo**  
**Tokelau**  
**Tonga**  
**Transnistria Pridnestrovie**  
**Trinidad and Tobago**  
**Tristan da Cunha**  
**Tunisia**  
**Turkey**  
**Turkmenistan**  
**Turks and Caicos Islands**  
**Tuvalu**  
**Uganda**  
**Ukraine**  
**United Arab Emirates**  
**United Kingdom**  
**United States**  
**Uruguay**  
**Uzbekistan**  
**Vanuatu**  
**Vatican City**

Venezuela  
Vietnam  
British Virgin Islands  
Isle of Man  
US Virgin Islands  
Wallis and Futuna  
Western Sahara  
Yemen  
Zambia  
Zimbabwe

10 - How many rooms (in total) in your house?

1  
2  
3  
4  
5  
6  
7  
8  
9  
10+

11.1.a -

0  
1  
2  
3  
4  
5  
6  
7  
8  
9  
10+

11.2.a -

0  
1



- 2
- 3
- 4
- 5
- 6
- 7
- 8
- 9
- 10+

11.3.a -

- 0
- 1
- 2
- 3
- 4
- 5
- 6
- 7
- 8
- 9
- 10+

14 - How many cats do you currently own?

- 1
- 2
- 3
- 4
- 5
- 6
- 7
- 8
- 9
- 10+

17 - How many cats have you owned previously in your whole lifetime (Including those you own now)?

- 1
- 2

- 3
- 4
- 5
- 6
- 7
- 8
- 9
- 10+

**21 - How old was your cat when you acquired him/her (in years)?**

**Between 0-1 year**

- 1
- 2
- 3
- 4
- 5
- 6
- 7
- 8
- 9
- 10
- 11
- 12
- 13
- 14
- 15
- 16
- 17
- 18
- 19
- 20+

**I don't know/not sure**

**22 - How old is your cat now?**

**Between 0-1 year**

- 1
- 2
- 3
- 4

**5**

**6**

**7**

**8**

**9**

**10**

**11**

**12**

**13**

**14**

**15**

**16**

**17**

**18**

**19**

**20+**

**I don't know/not sure**

---
